# Supplementary material
Source: bioRxiv or medRxiv preprint supplement (https://www.biorxiv.org/highwire/filestream/23330/field_highwire_adjunct_files/5/083931-14.pdf)

Figure S14.1

Both species Split reads in one species, trio assembly in both

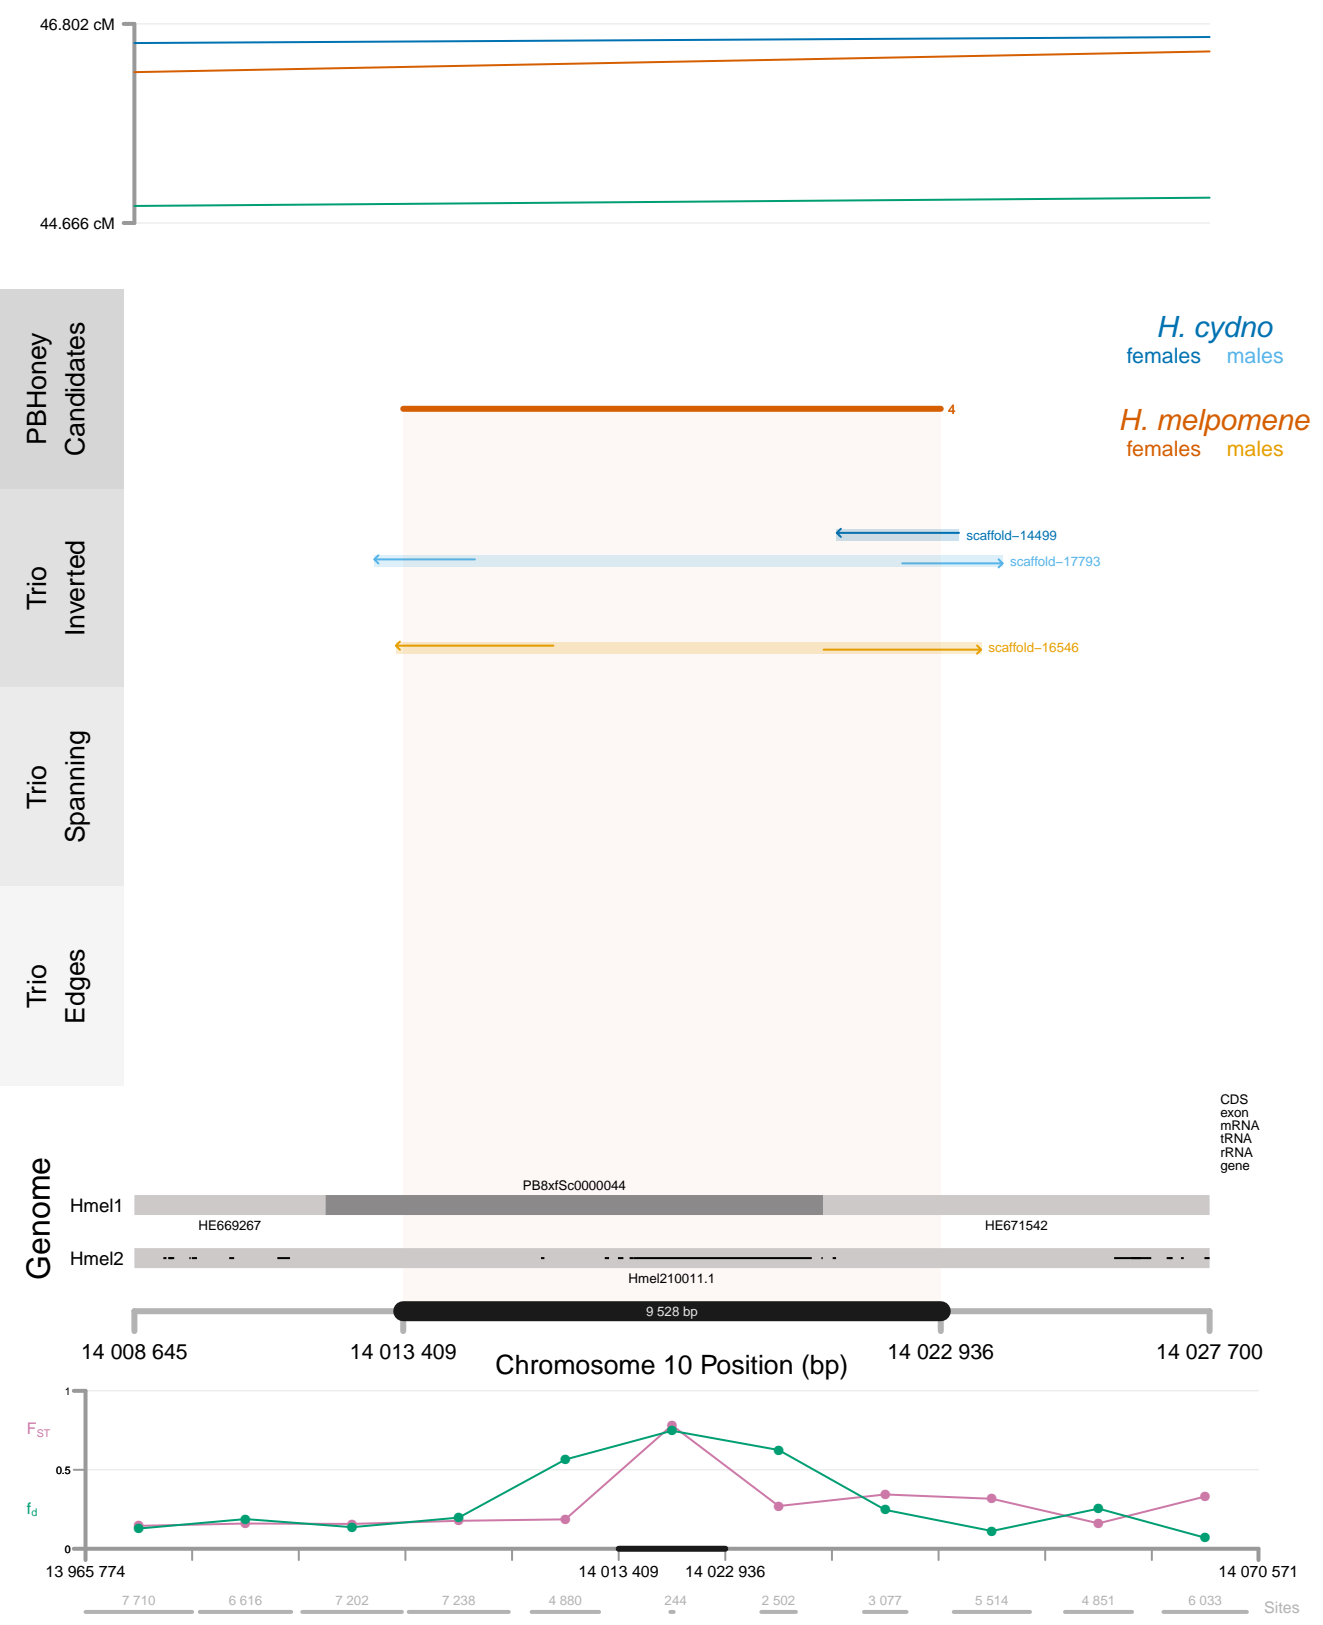

Figure S14.2

Both species Split reads in one species, trio assembly in both

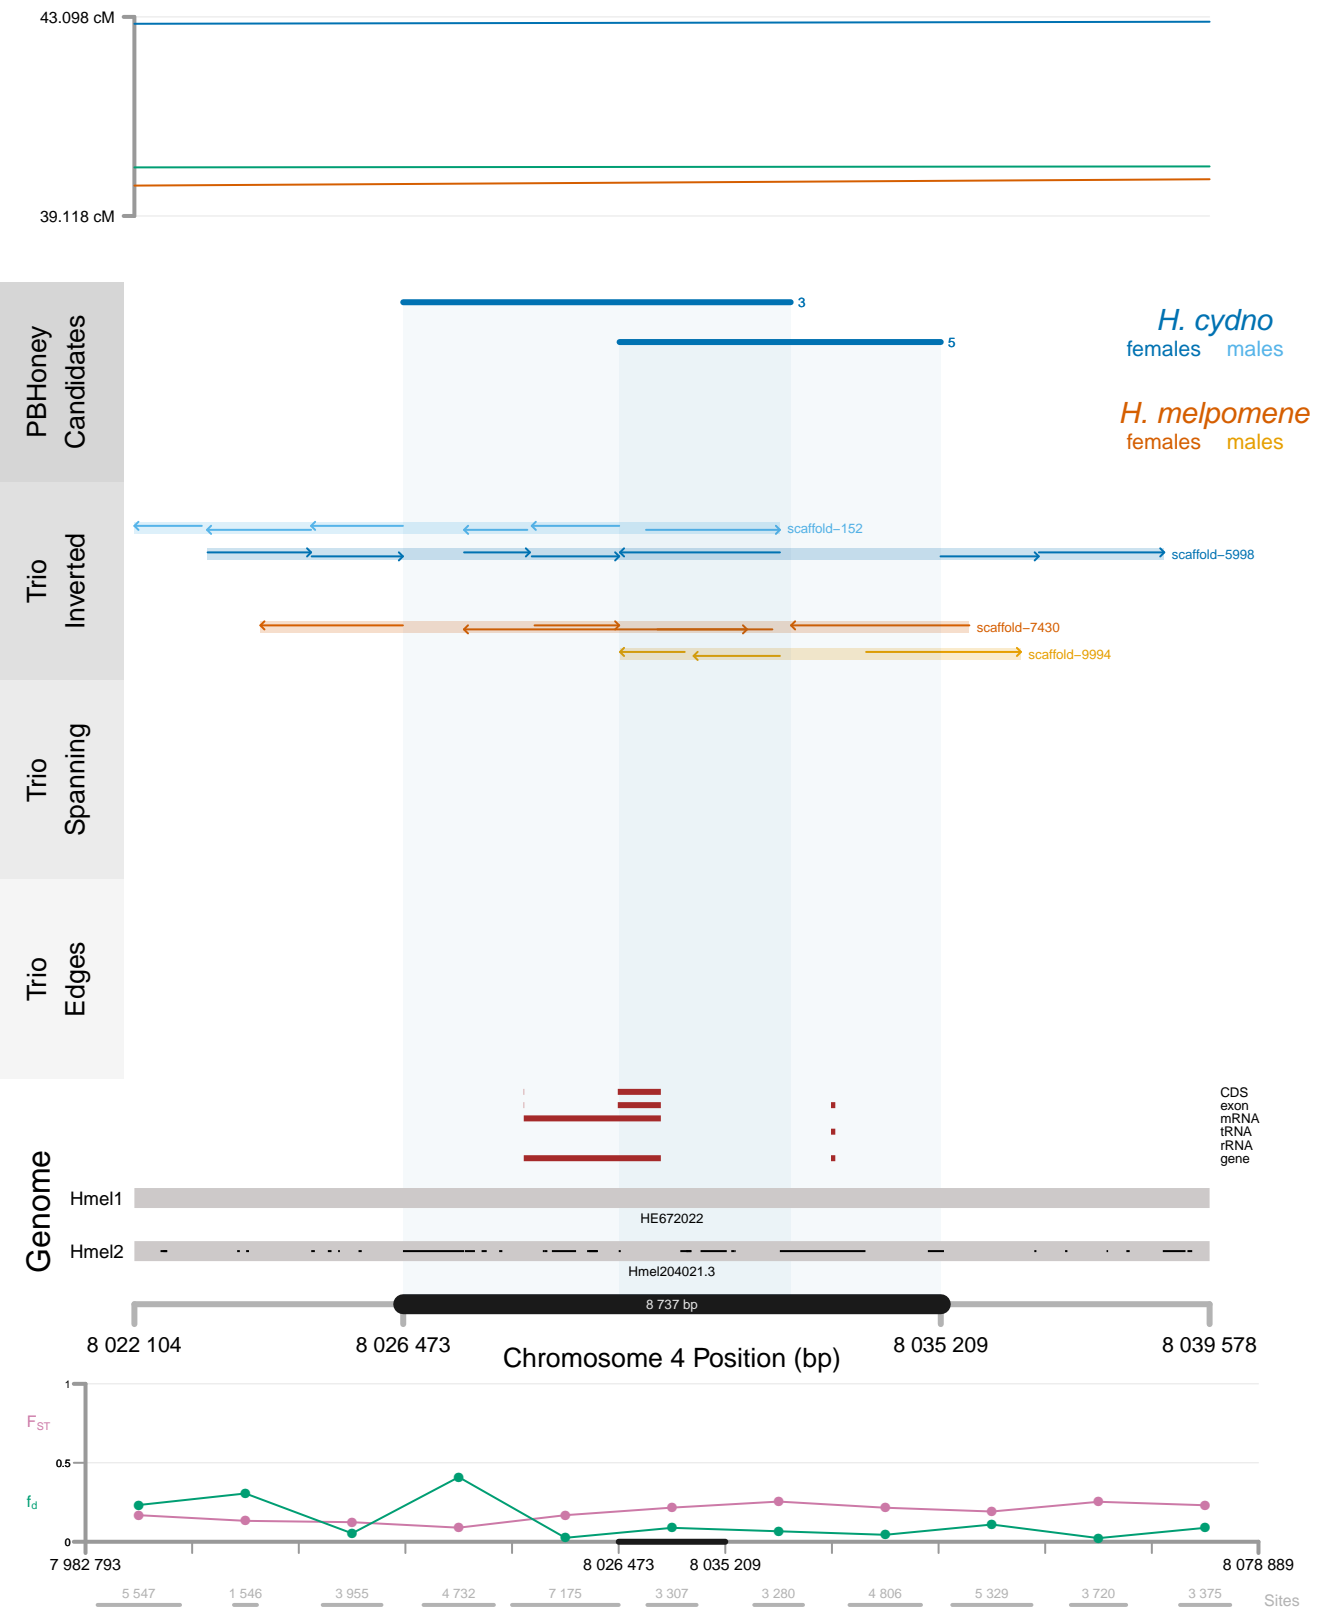

Figure S14.3

Both species Split reads in one species, trio assembly in both

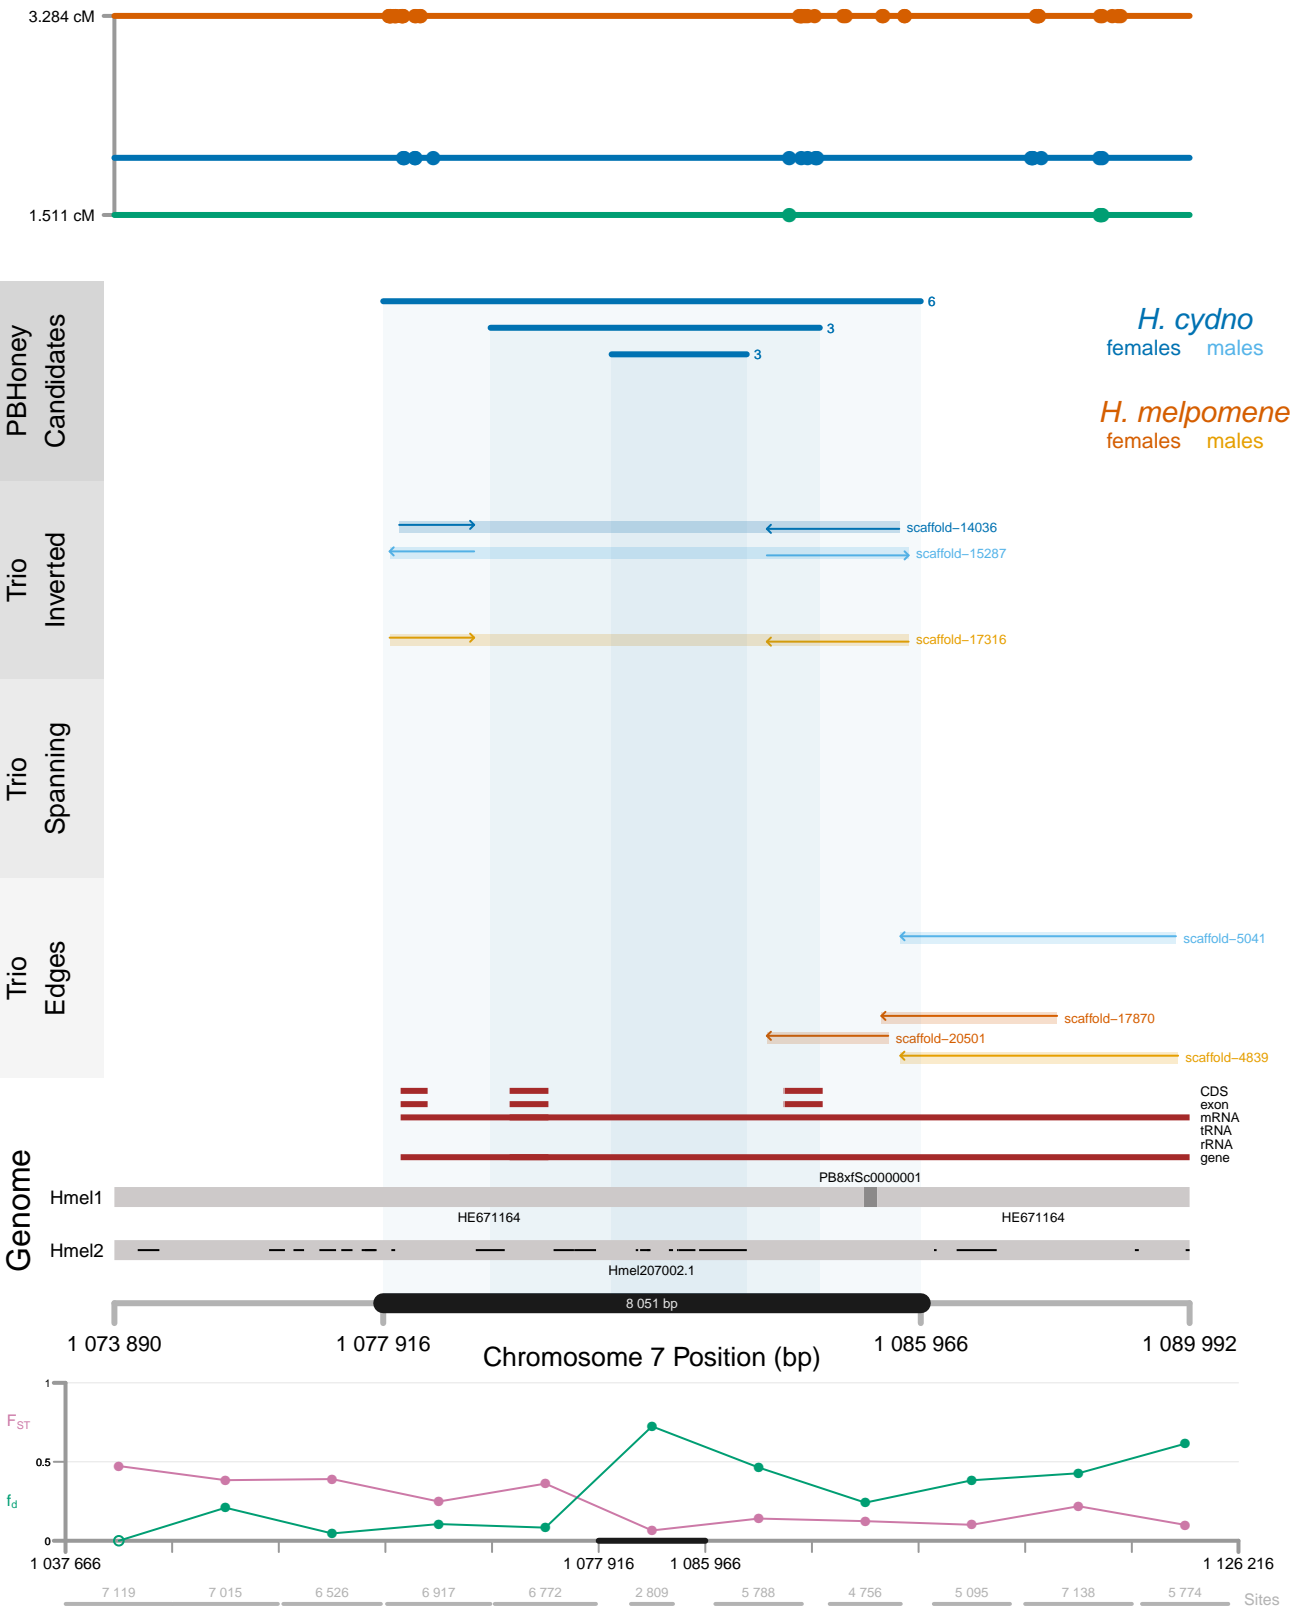

Figure S14.4

Both species Split reads in one species, trio assembly in both

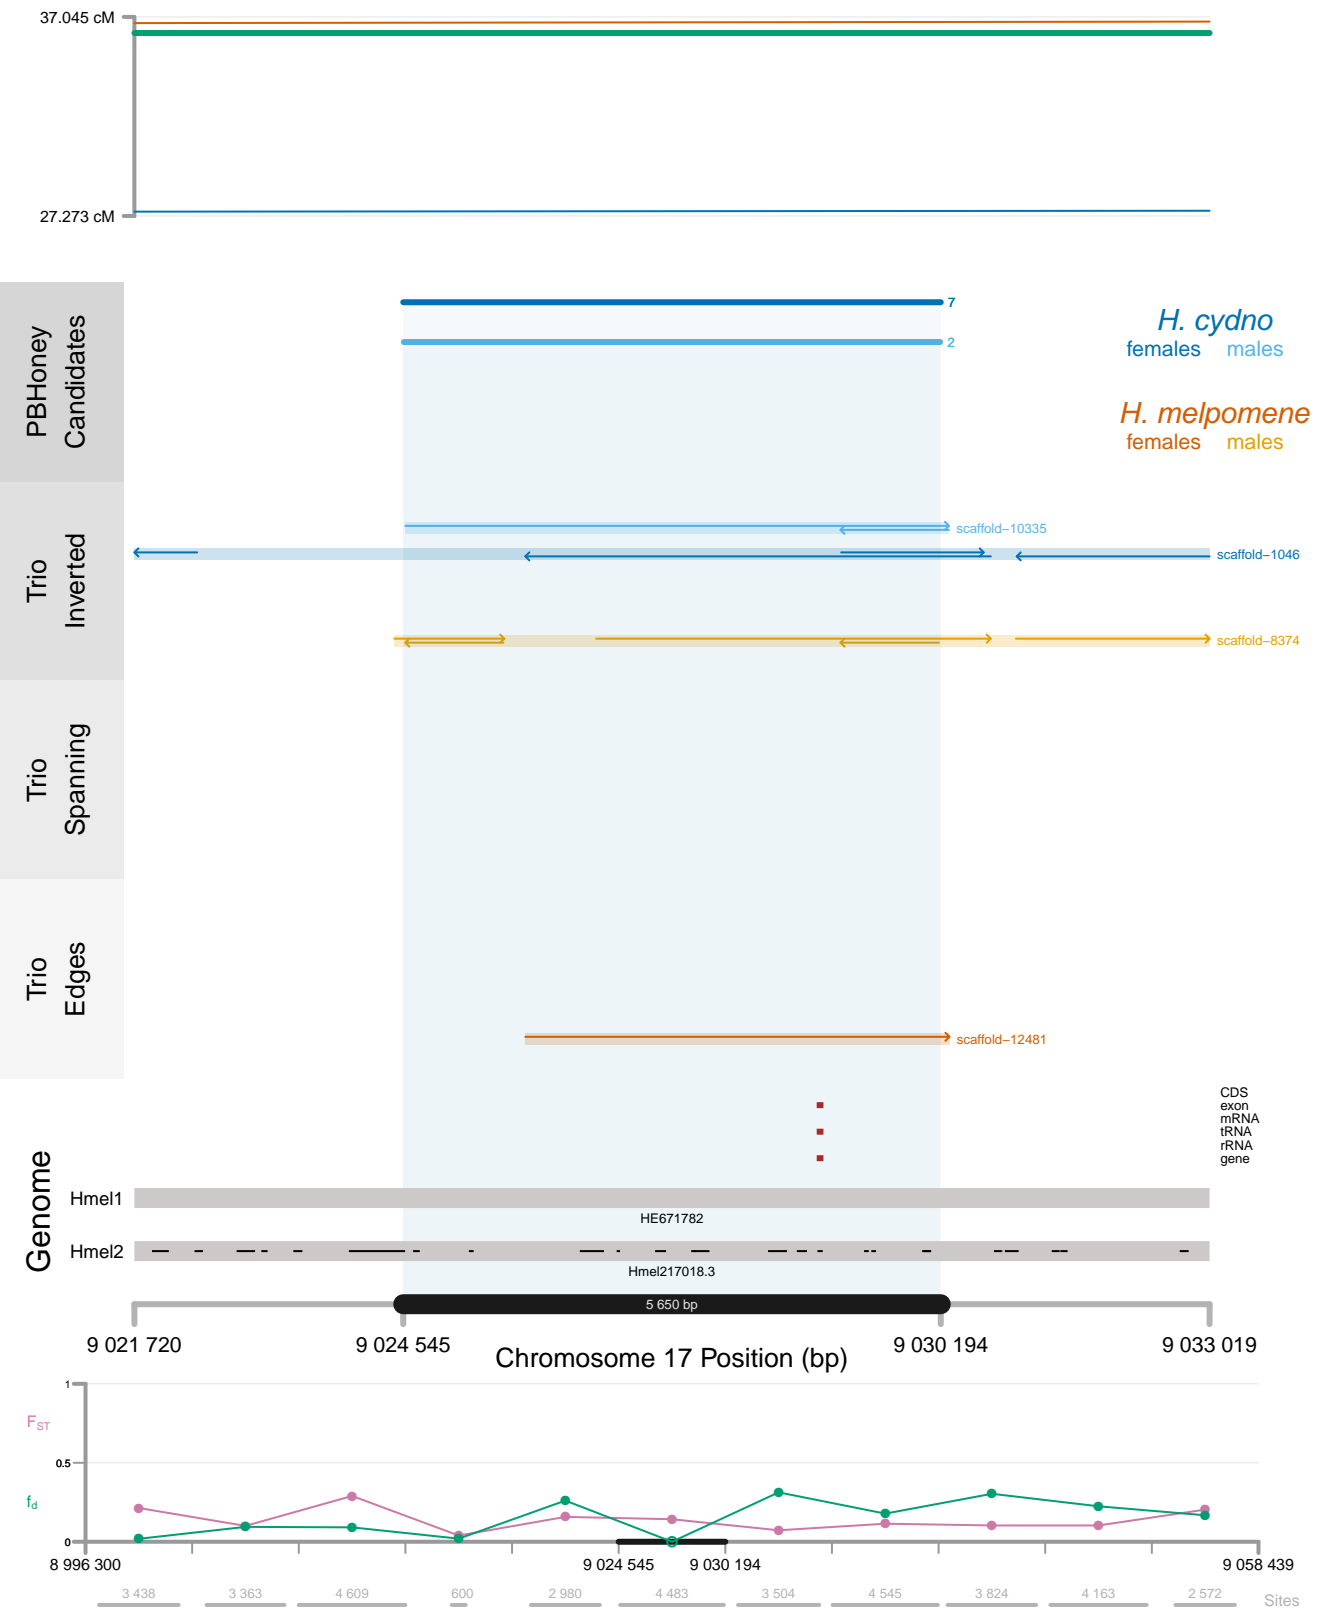

Figure S14.5

Both species Split reads in one species, trio assembly in both

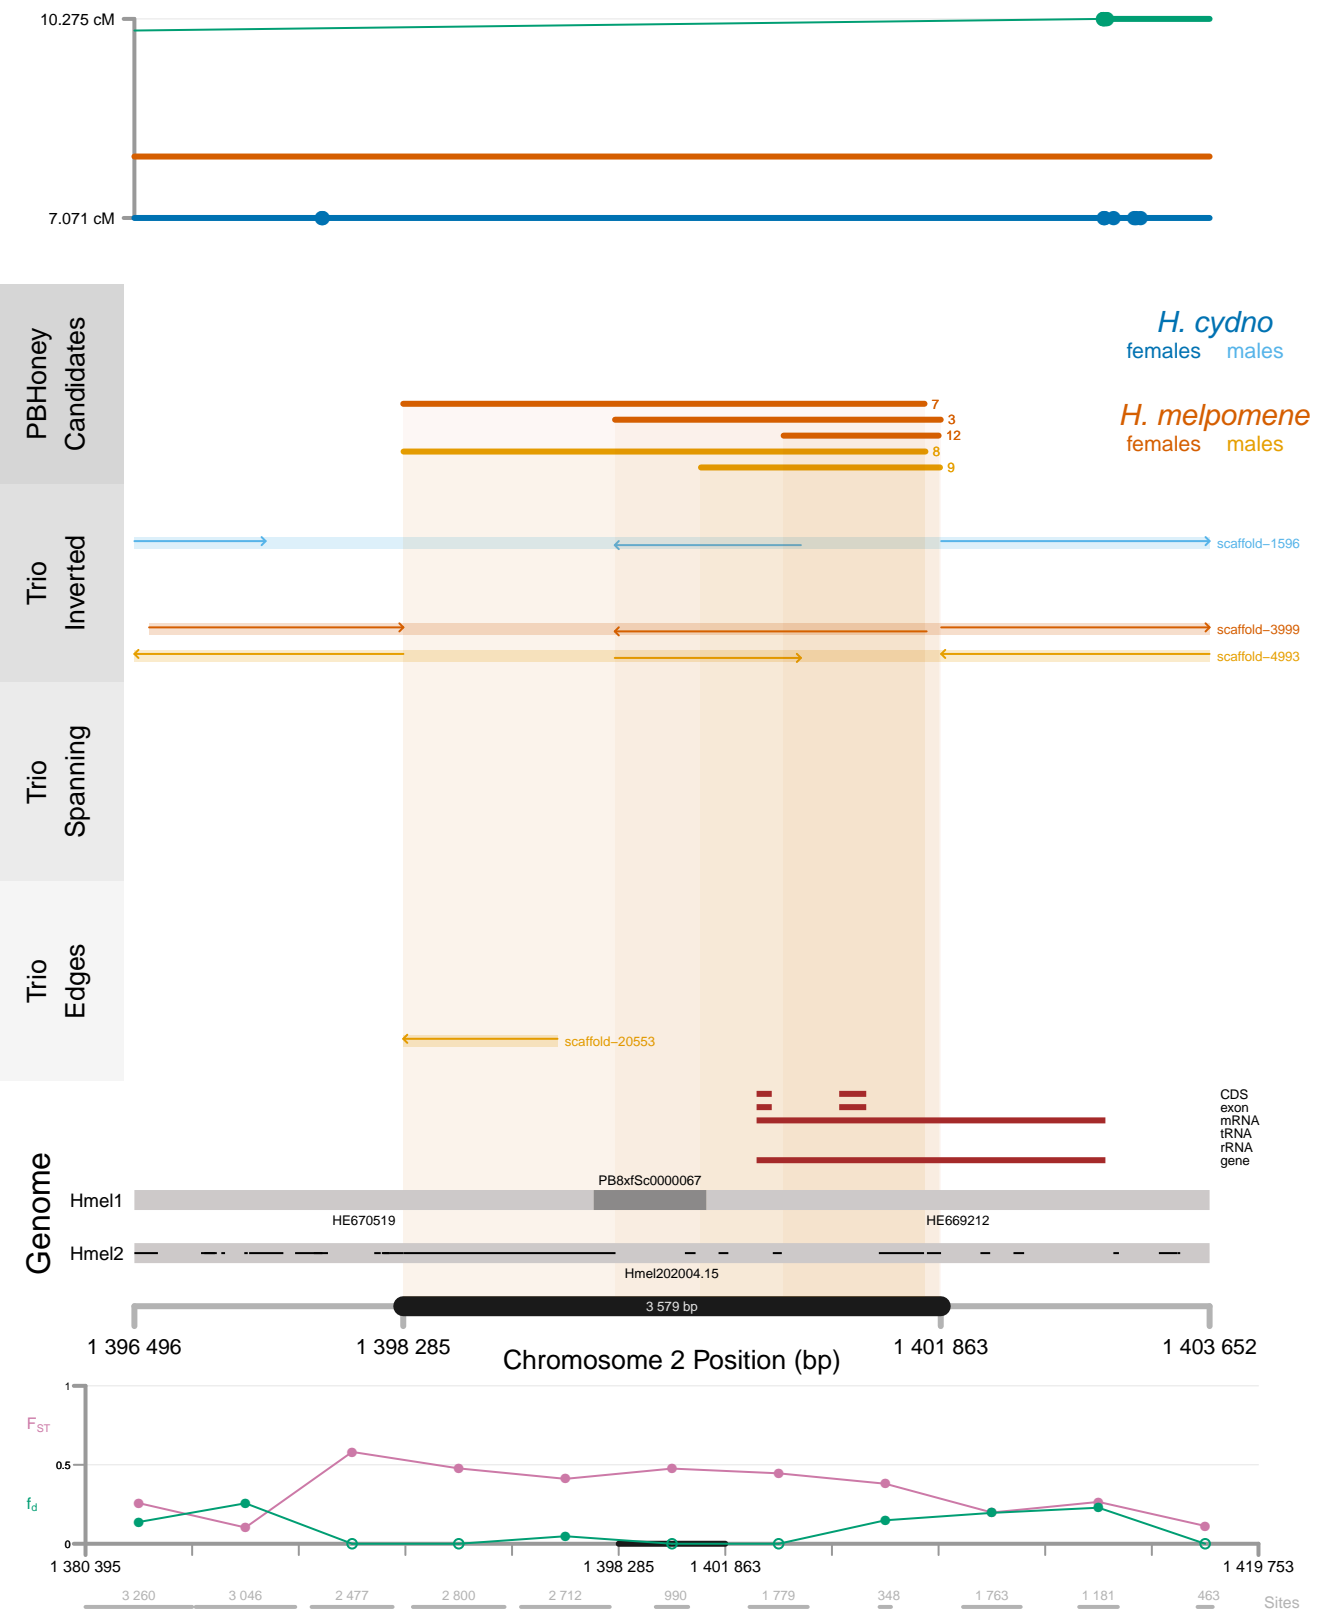

Figure S14.6

Both species Split reads in one species, trio assembly in both

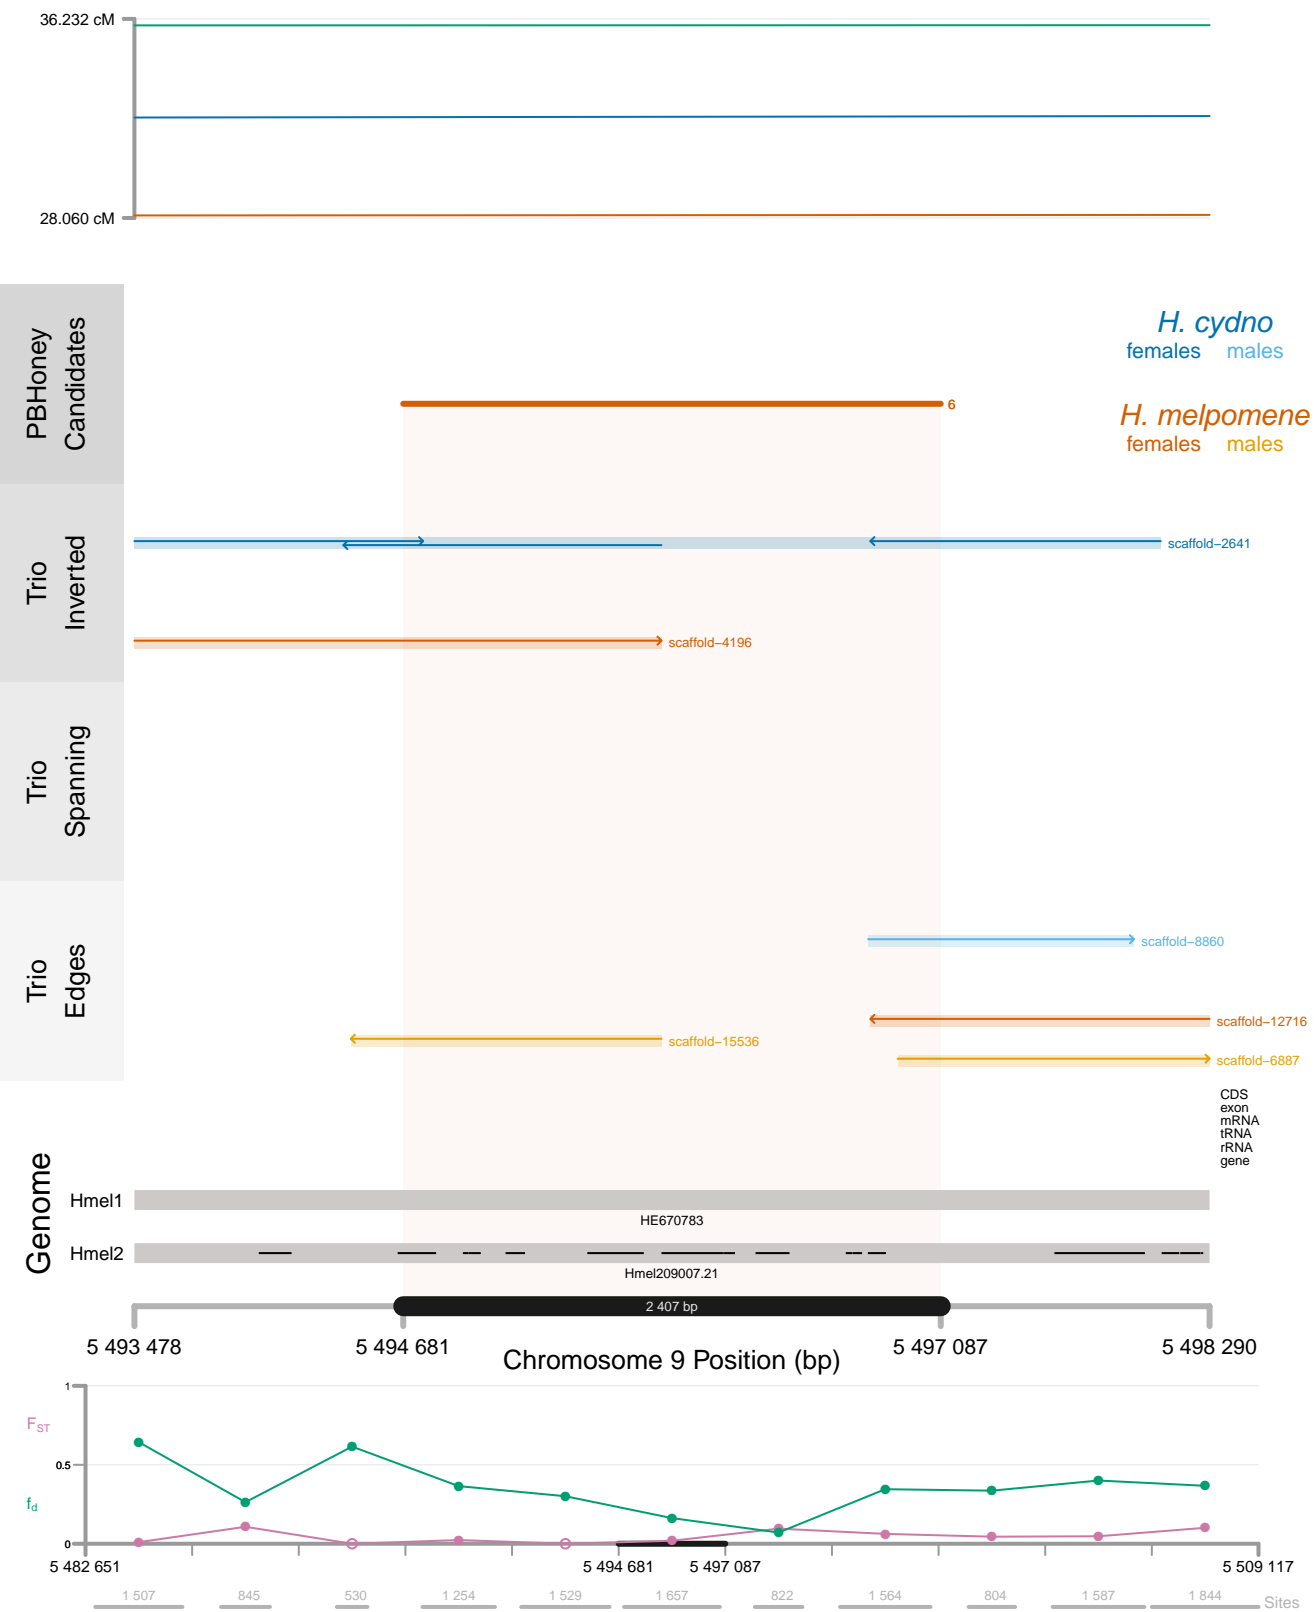

Supplement: Supplementary file [file 083931-14.pdf]
